# Supplementary material for: A Novel Fluorescent Aptasensor for Arsenic(III) Detection Based on a Triple-Helix Molecular Switch
Source: MDPI journal article supplement (doi:10.3390/molecules28052341), 2023-03-03
Supplement: s1 [file s1]

Table S1 The raw data of Figure 5.

| Ions             | F <sub>1</sub> -F <sub>2</sub> | Error    |
|------------------|--------------------------------|----------|
| As(III)          | 297.94                         | 13.8     |
| Pb <sup>2+</sup> | 46.787                         | 1.86252  |
| Cd <sup>2+</sup> | 38.288                         | 8.4273   |
| Ni <sup>2+</sup> | 38.0625                        | 4.79206  |
| Cr <sup>3+</sup> | 2.23767                        | 9.95224  |
| Zn <sup>2+</sup> | 32.848                         | 10.14415 |
| As(V)            | 75.884                         | 13.13239 |
